# Supplementary material
Source: publisher figshare collection journal article supplement (https://gsajournals.figshare.com/ndownloader/files/25300472)
Supplement: Supplementary file 1 [file 25300472]

|  |  |  |  |
| --- | --- | --- | --- |
| **TABLE S3. PRIMER NAMES AND SEQUENCES** | | | |
|  |  |  |  |
| **Primer name** | | **Sequence** |  |
| *P1utan600fw* | | AACTGGATCGTCTAACAAGT | |
| *P1utan300rev* | | GGATTGATTAACCACACAGA | |
| *P11189fw* |  | AAGGAATGTGGACACCATAG | |
| *P11189rev* | | CGCAGGAGCCTACGATAATC | |
| *Egr_F1* |  | CCAGAGCCCACTGTATCACC | |
| *Egr_R3* |  | TCACCTCCTTTTGGAACTCG | |
| *Nimrod_del_F1* | | CCGGGCTACGTAATGAGAAA | |
| *Nimrod_del_R1* | | CAATTTGAGTGCGGAACCTC | |
|  |  |  |  |
|  |  |  |  |
